# Supplementary material for: Addition of 4-(cyclohex-1-en-1-yl)morpholine on 3-nitroindole: an unprecedented dearomatizing process
Source: Royal Society of Chemistry journal article supplement (doi:10.1039/c5ob02595h), 2016-01-01

**Addition of enamines on 3-nitroindole : an unprecedented dearomatizing  
process**

Manuel Andreini, Fabien Chapellas, Sonia Diab, Karine Pasturaud, Serge R. Piettre, Julien  
Legros, Isabelle Chataigner\*

**Supporting information:**

X-Ray structures of **11** and **16**

NMR spectra for compounds **3a**, **11**, **13**, **14**, **15**, **16**, **20**.

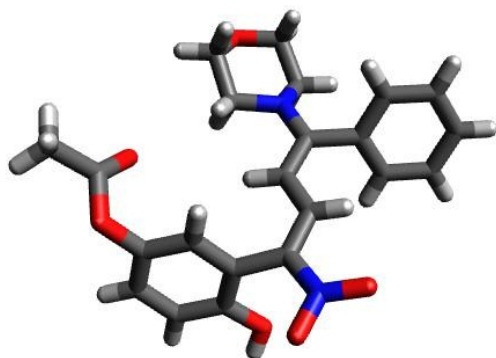

X-Ray structure of phenol **11**

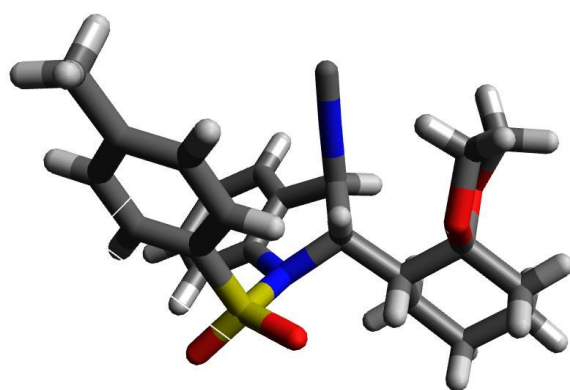

X-Ray structure of indolinoisonitrile **16**

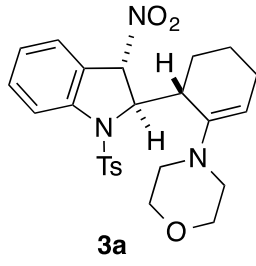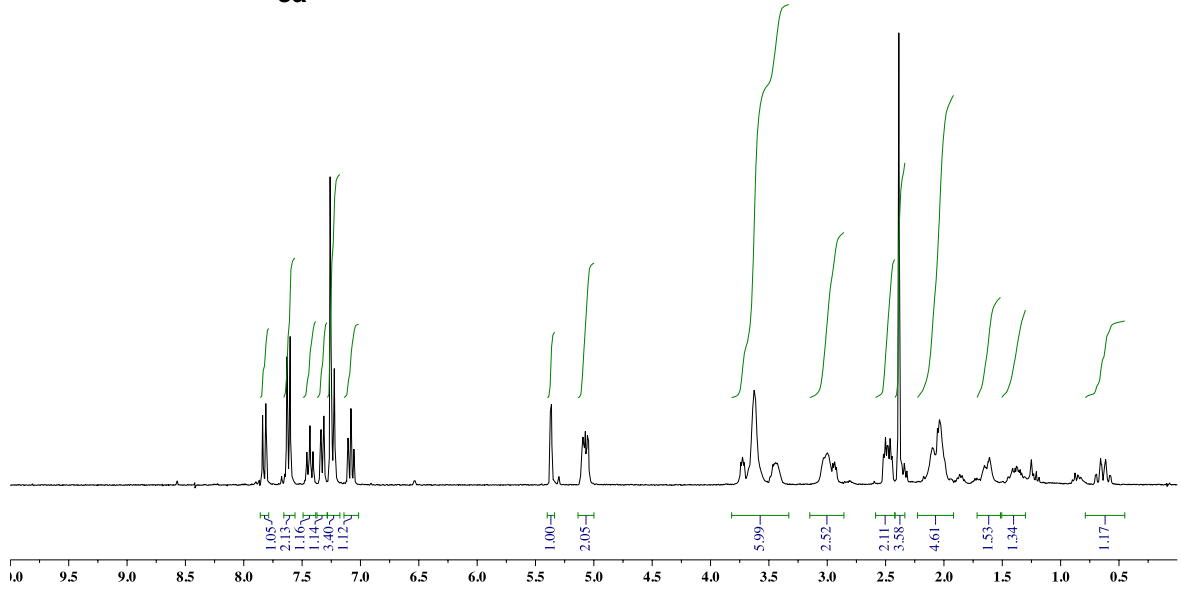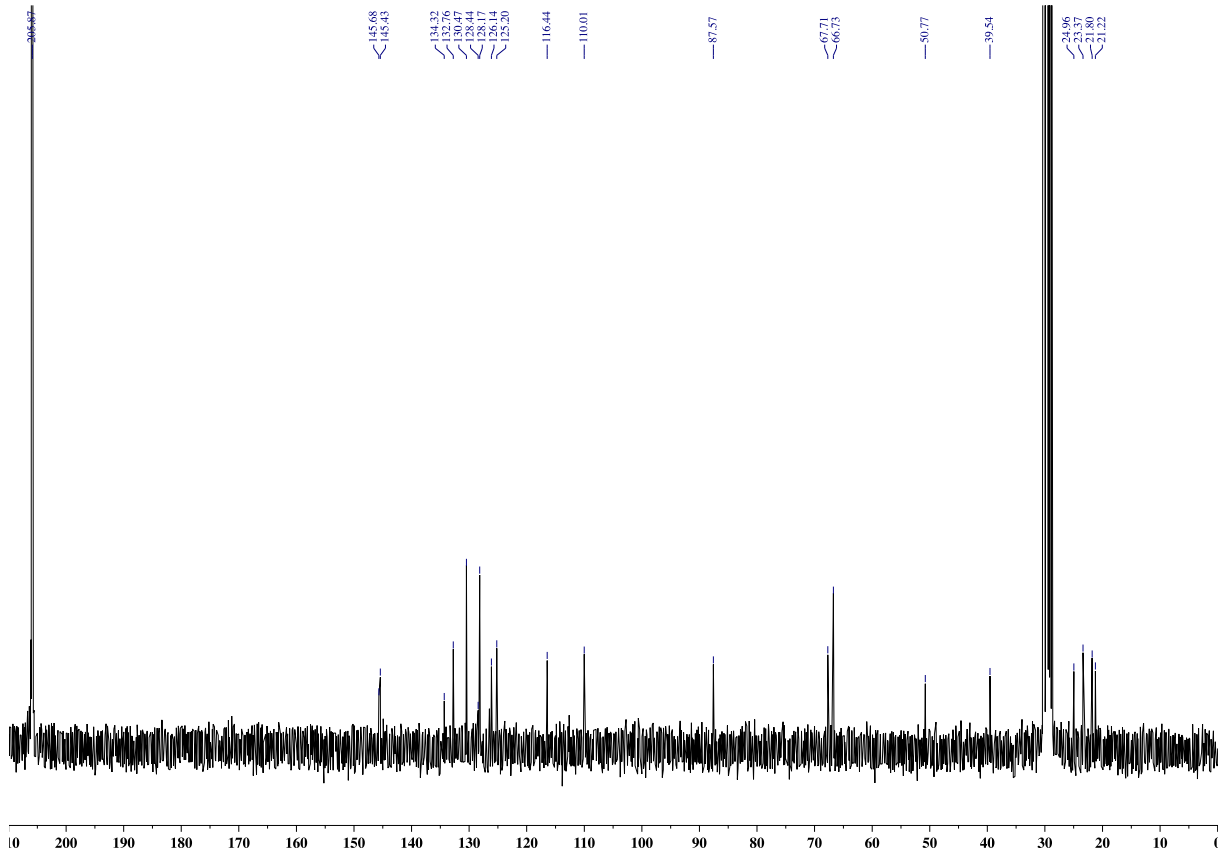

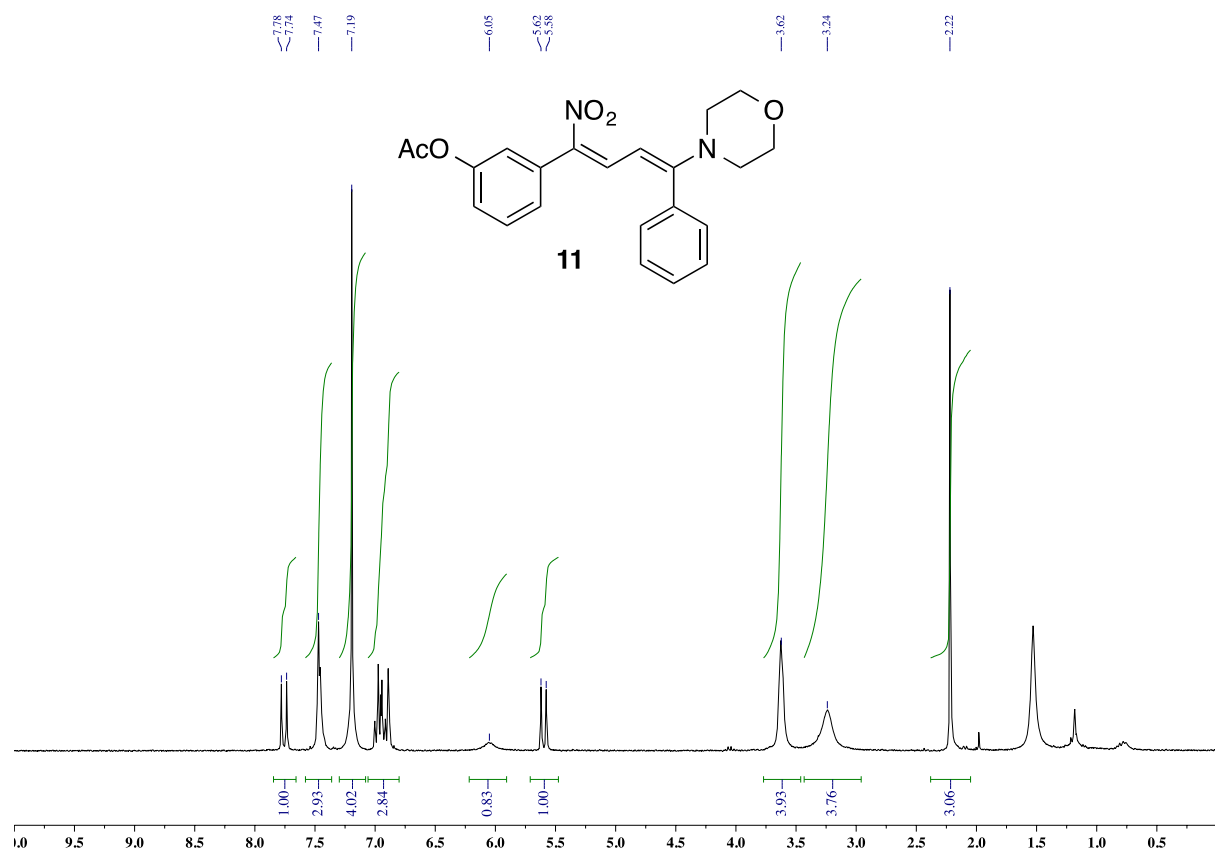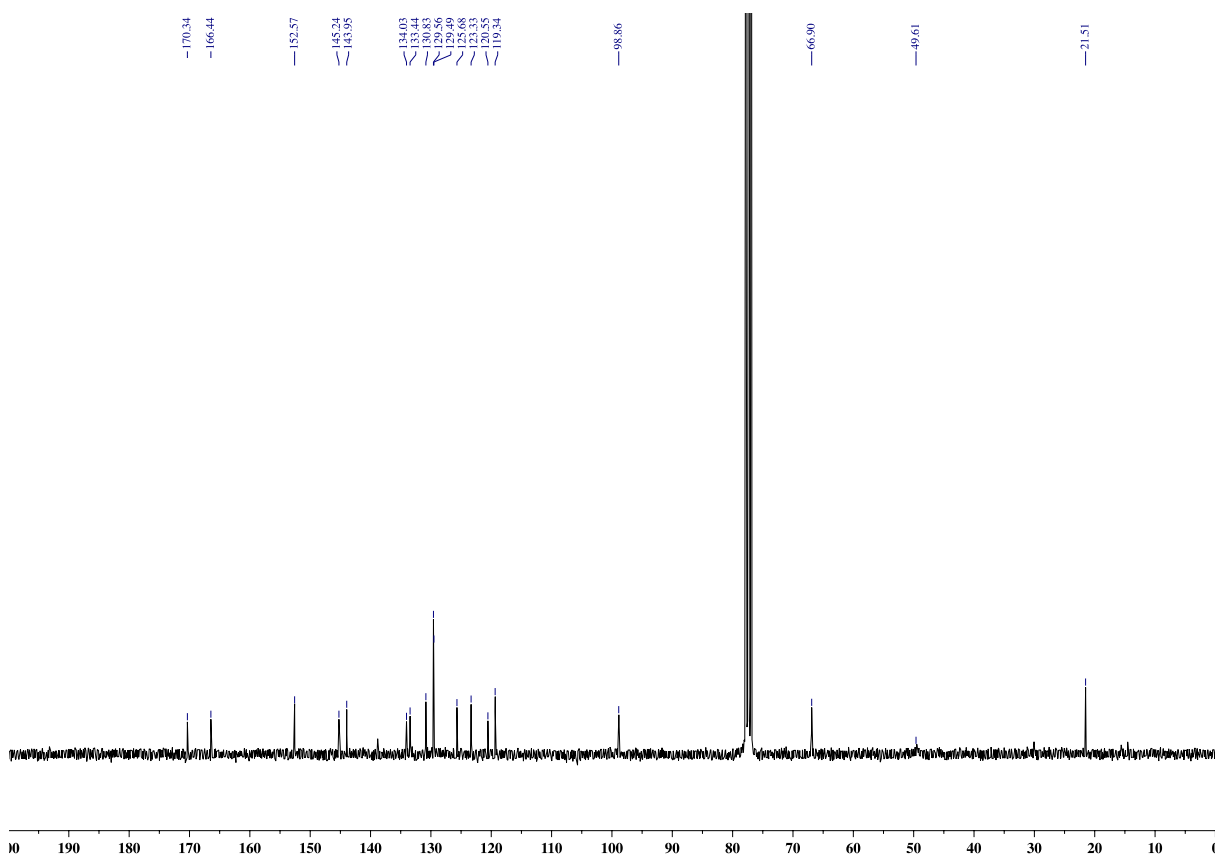

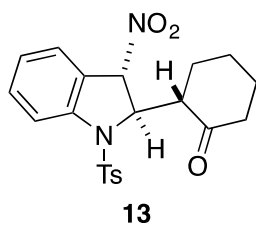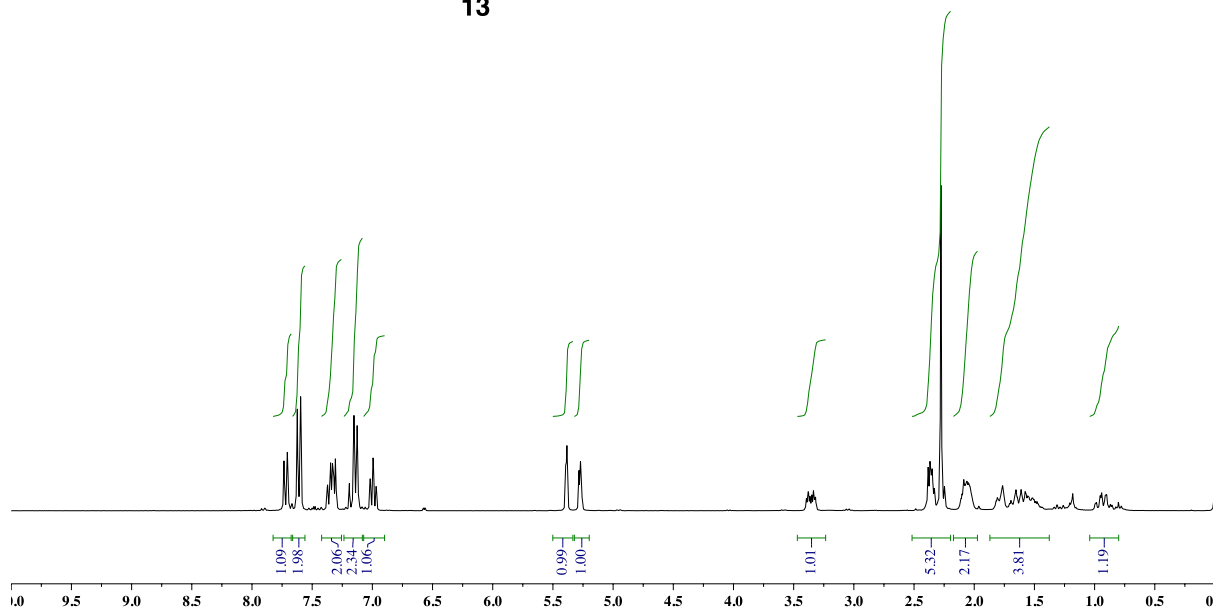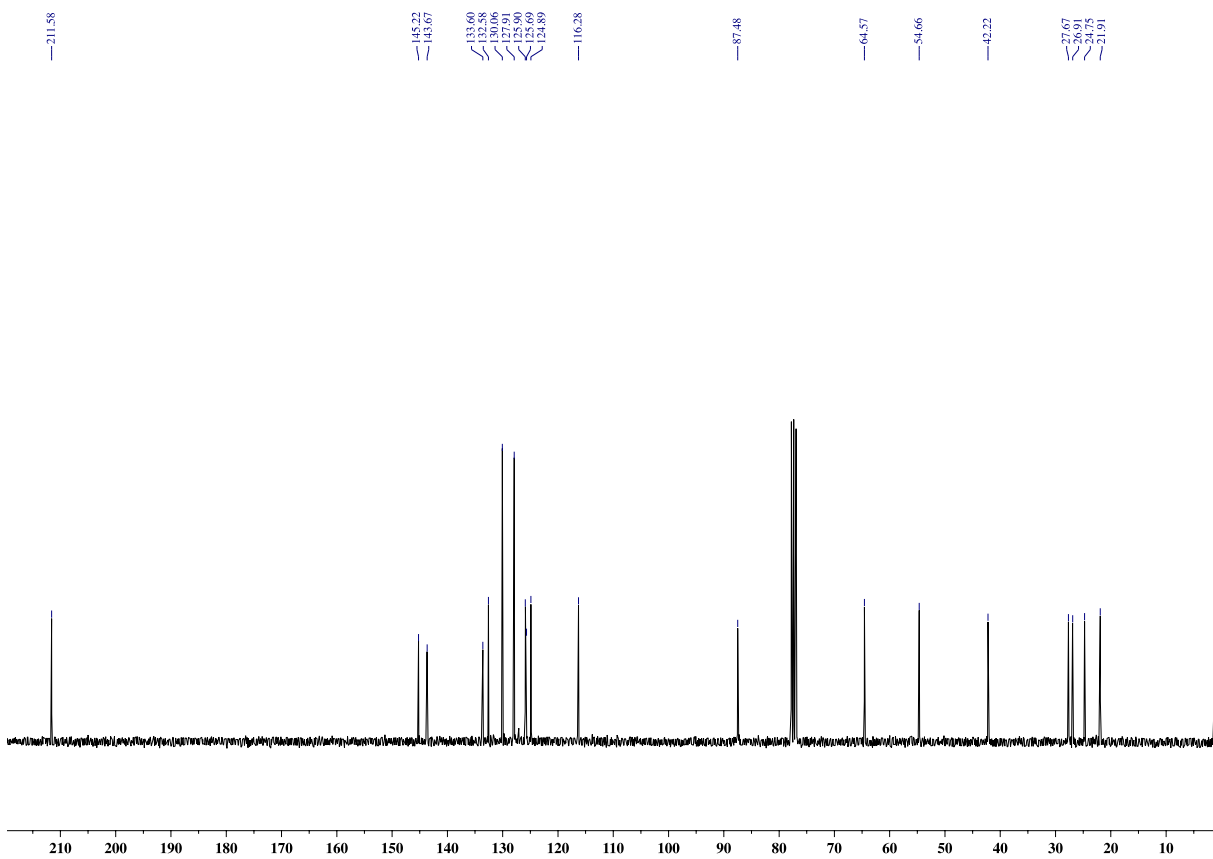

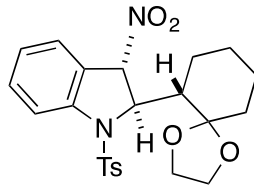

**14**

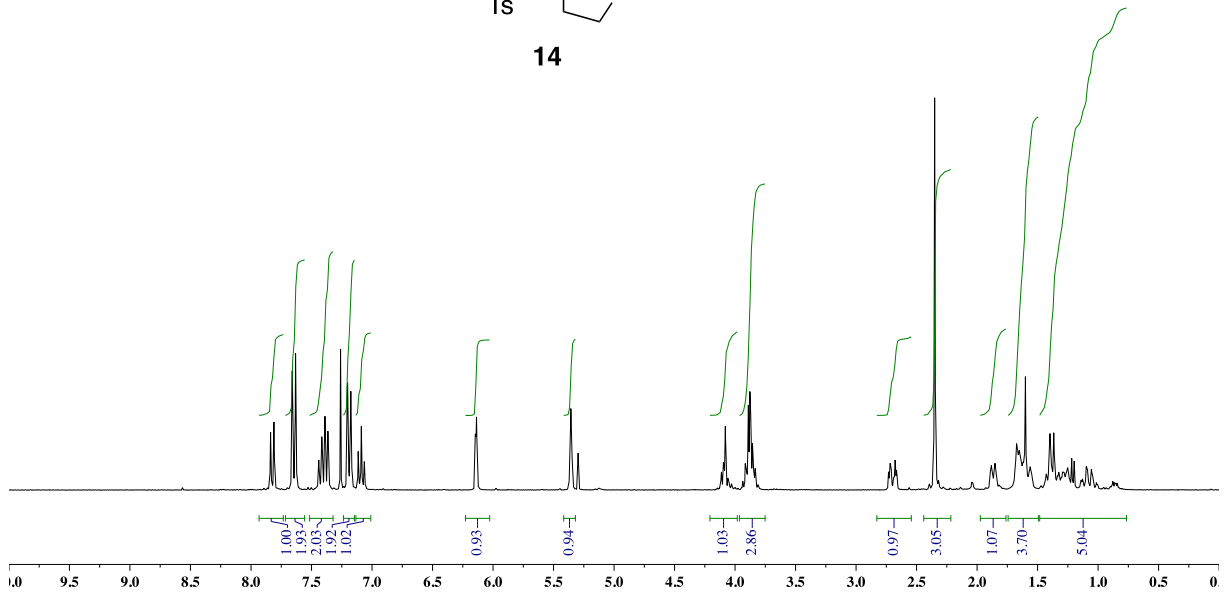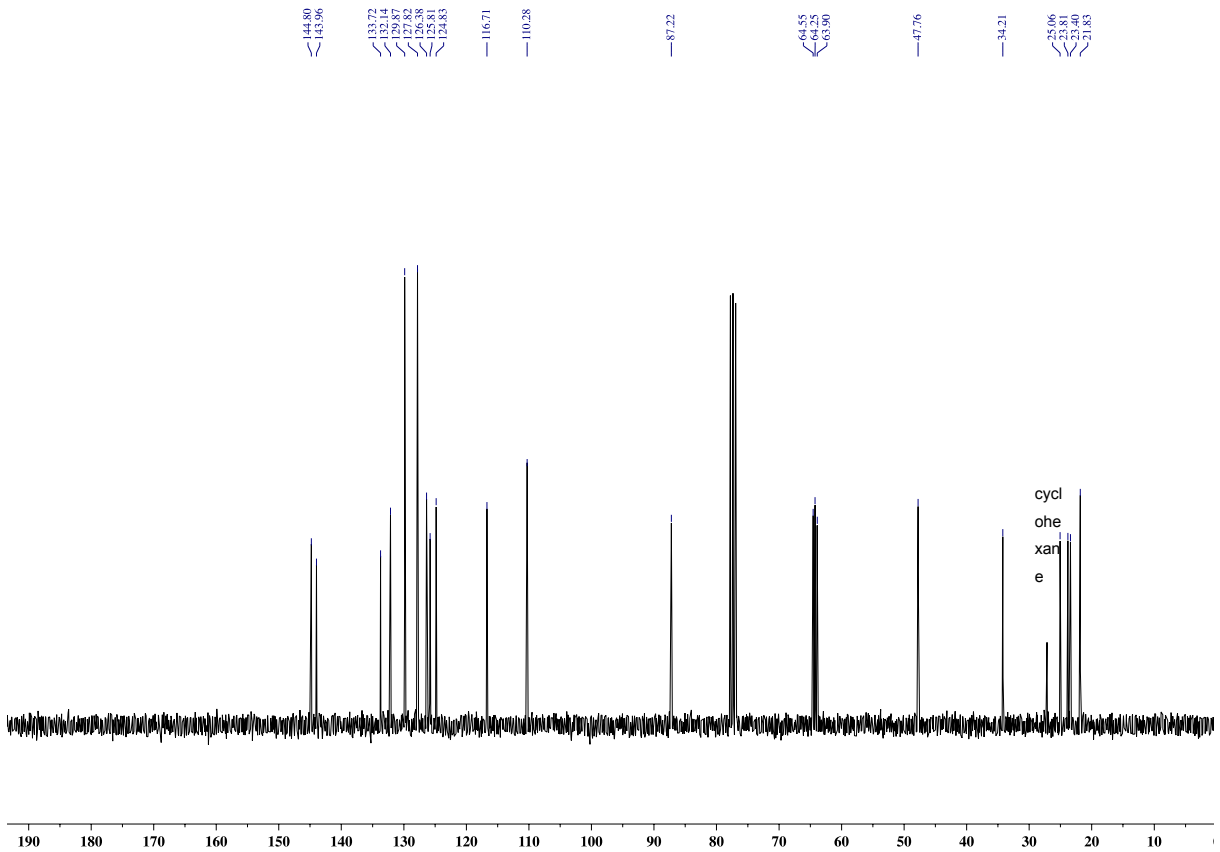

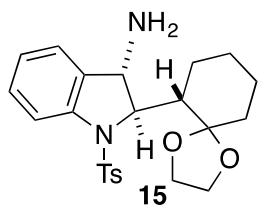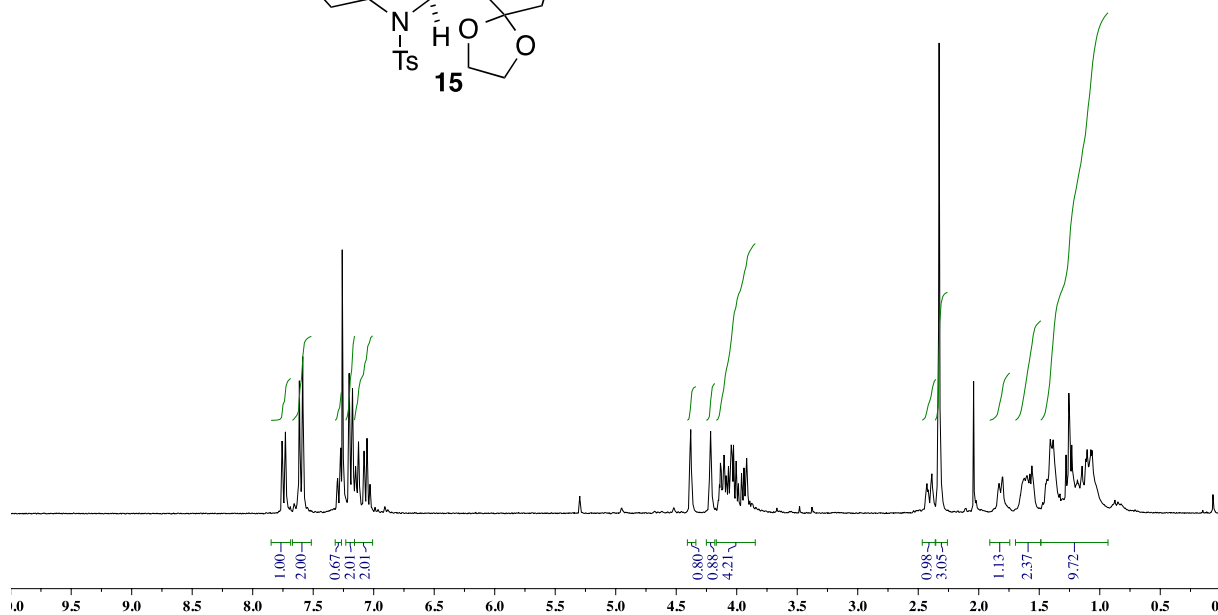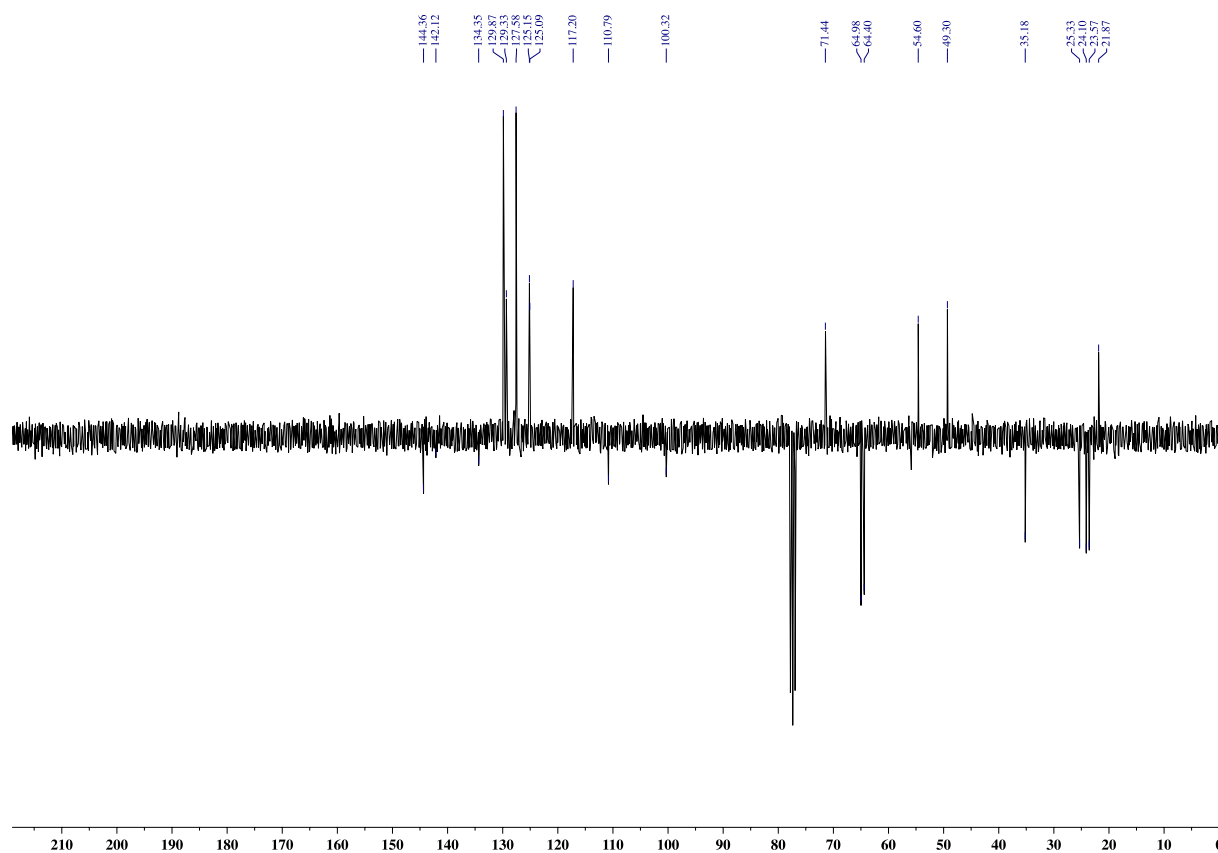

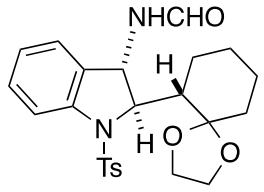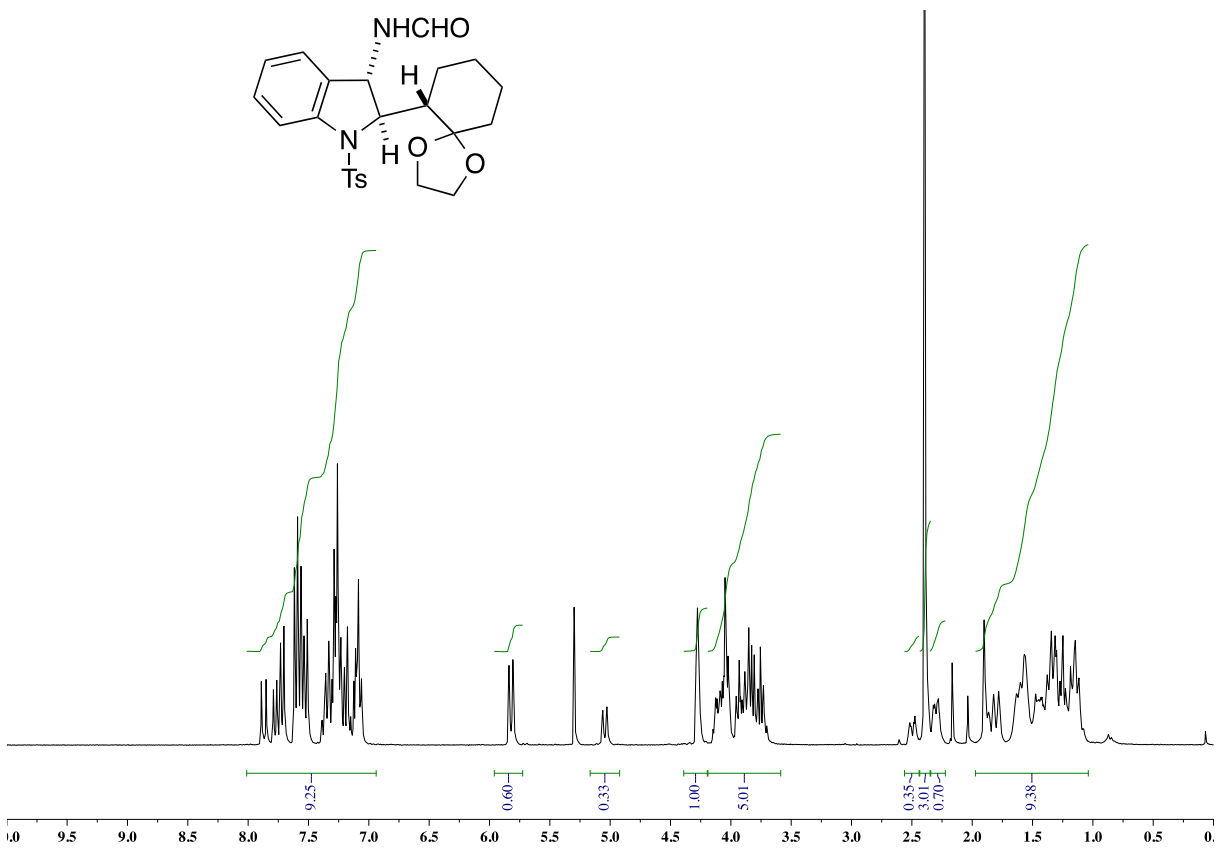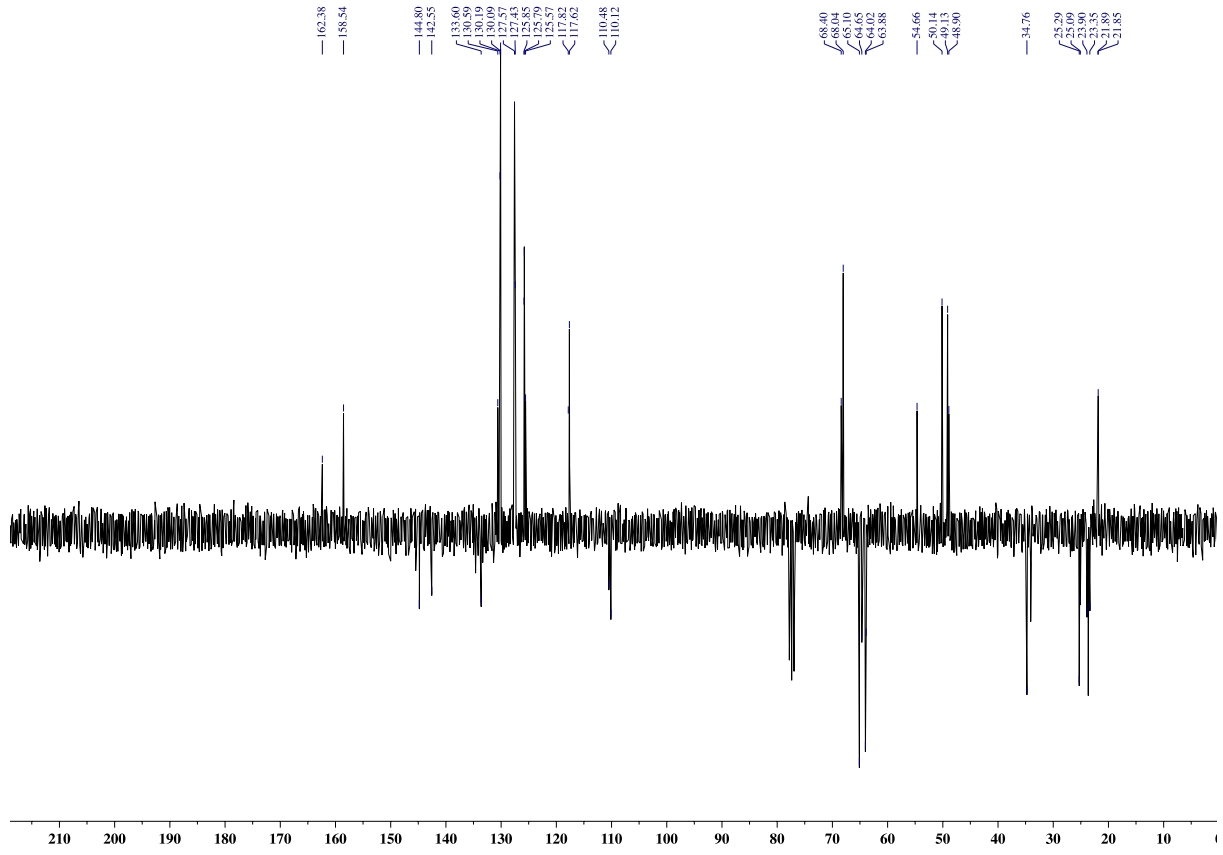



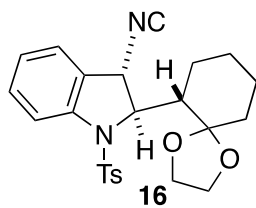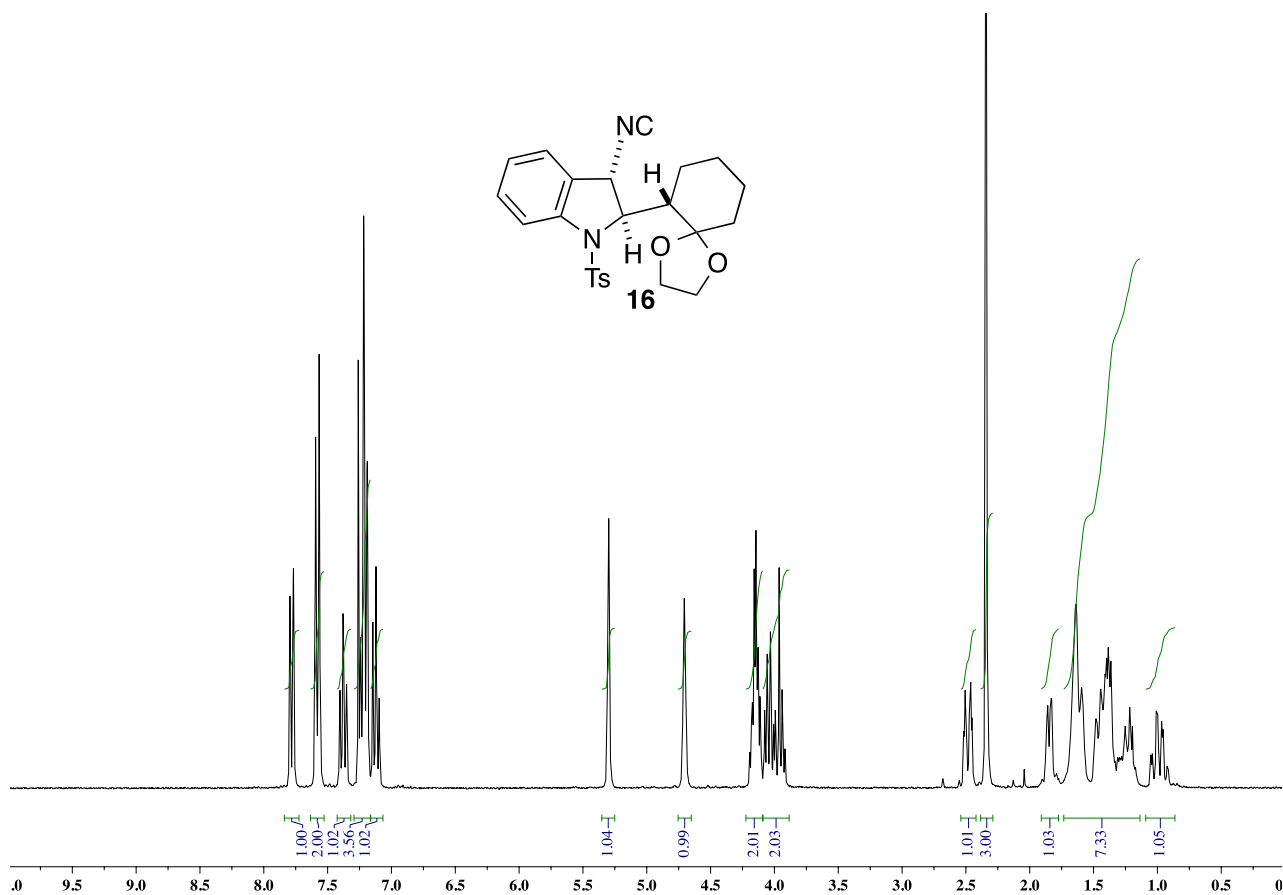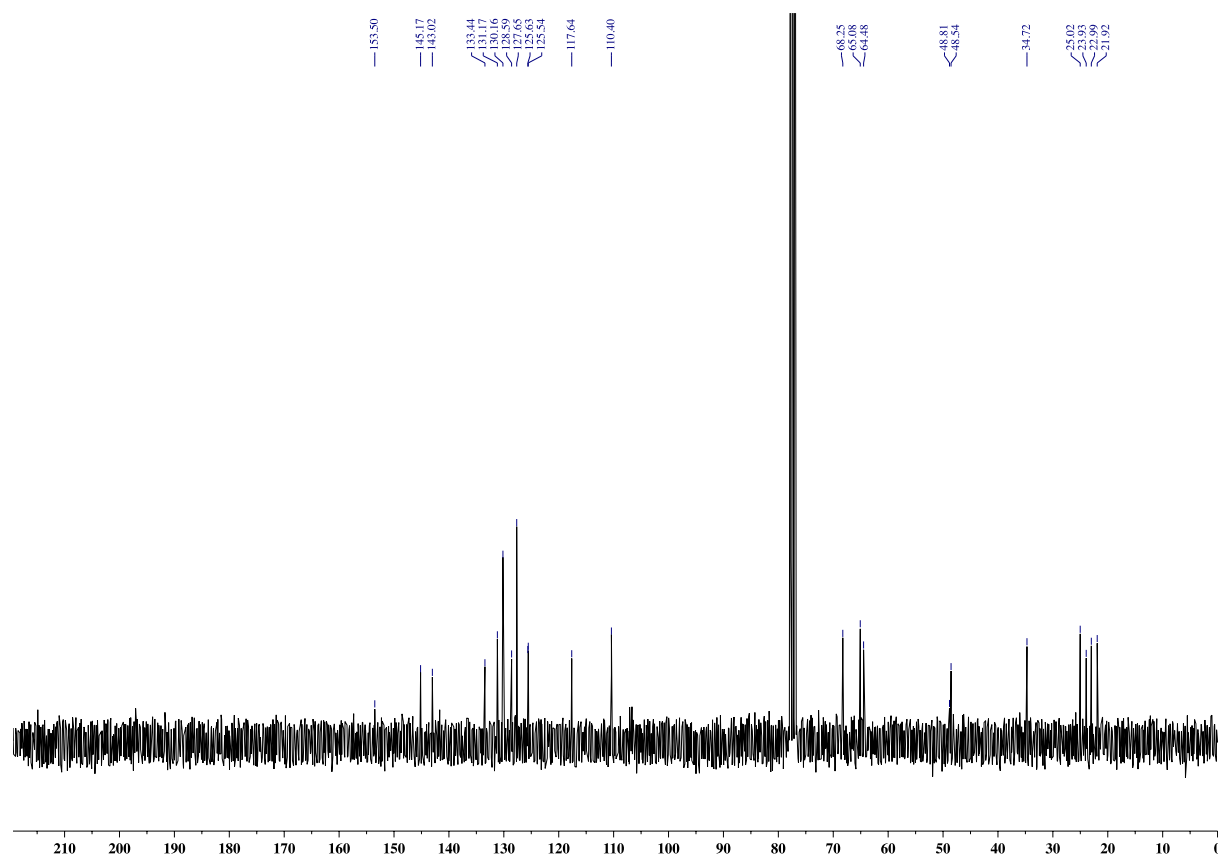

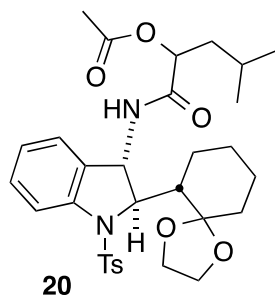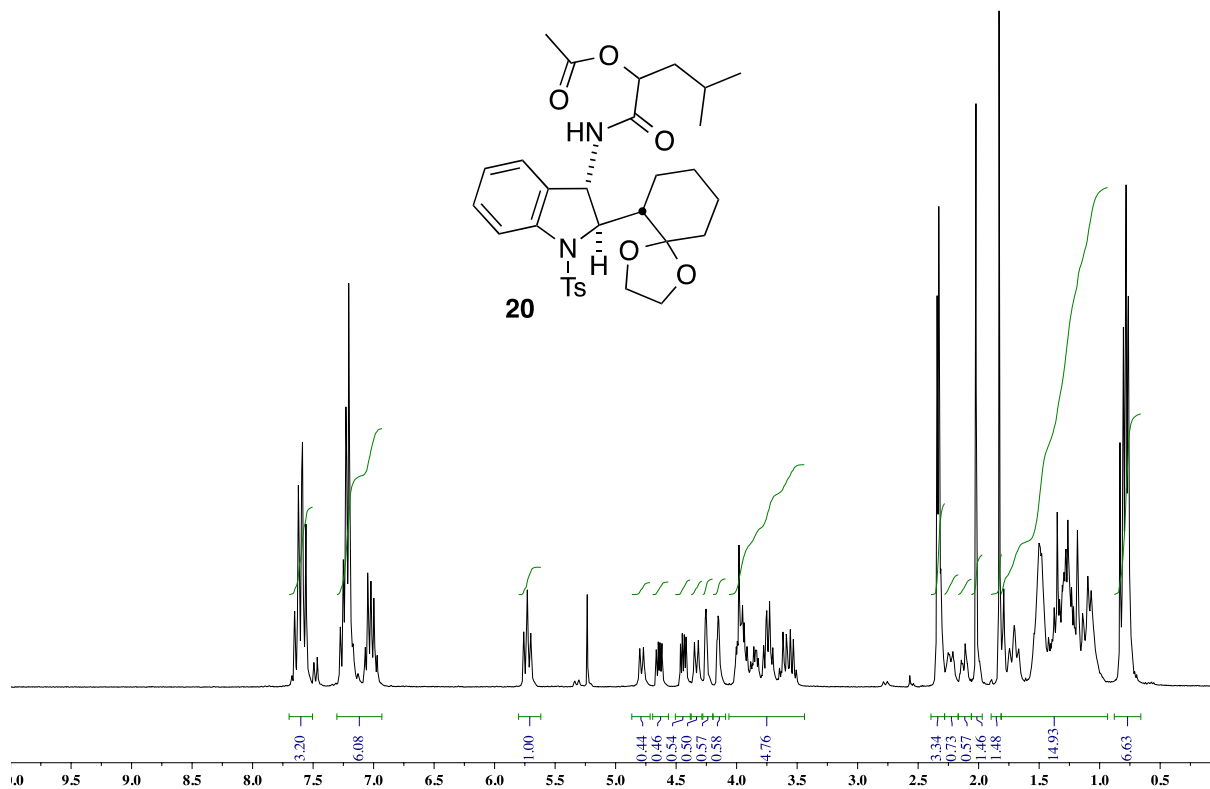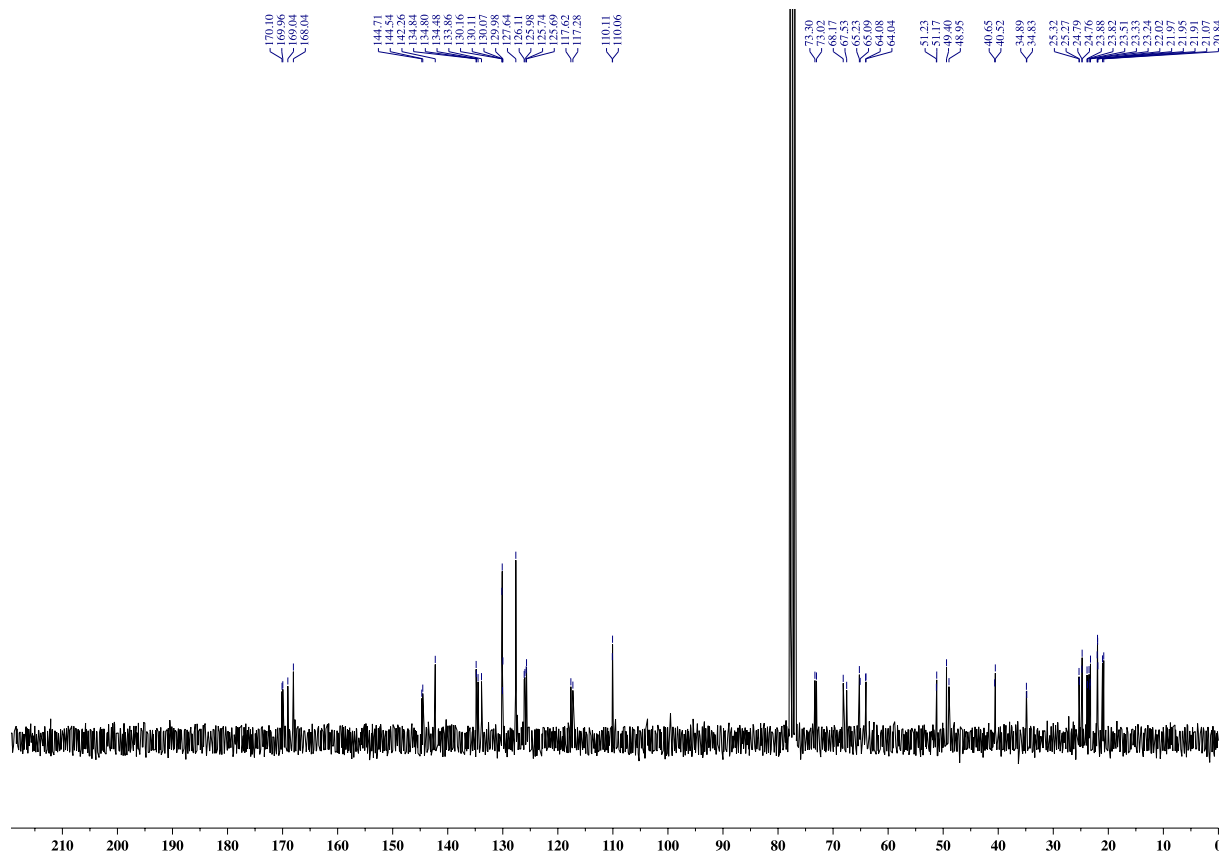

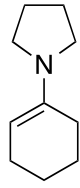

**2b**

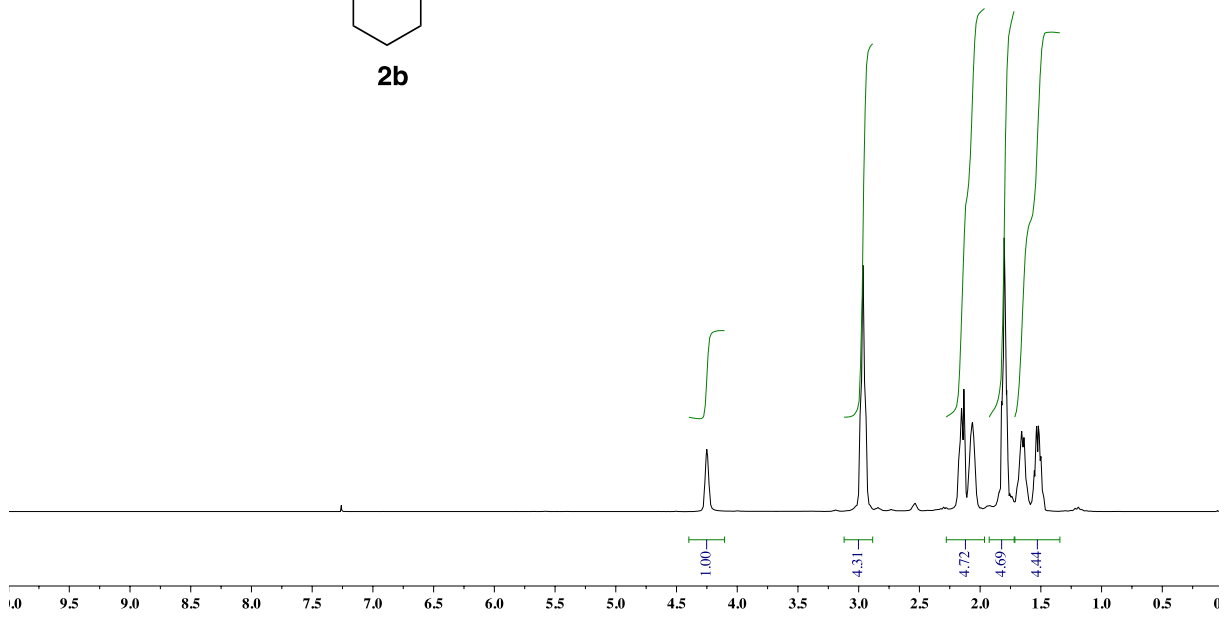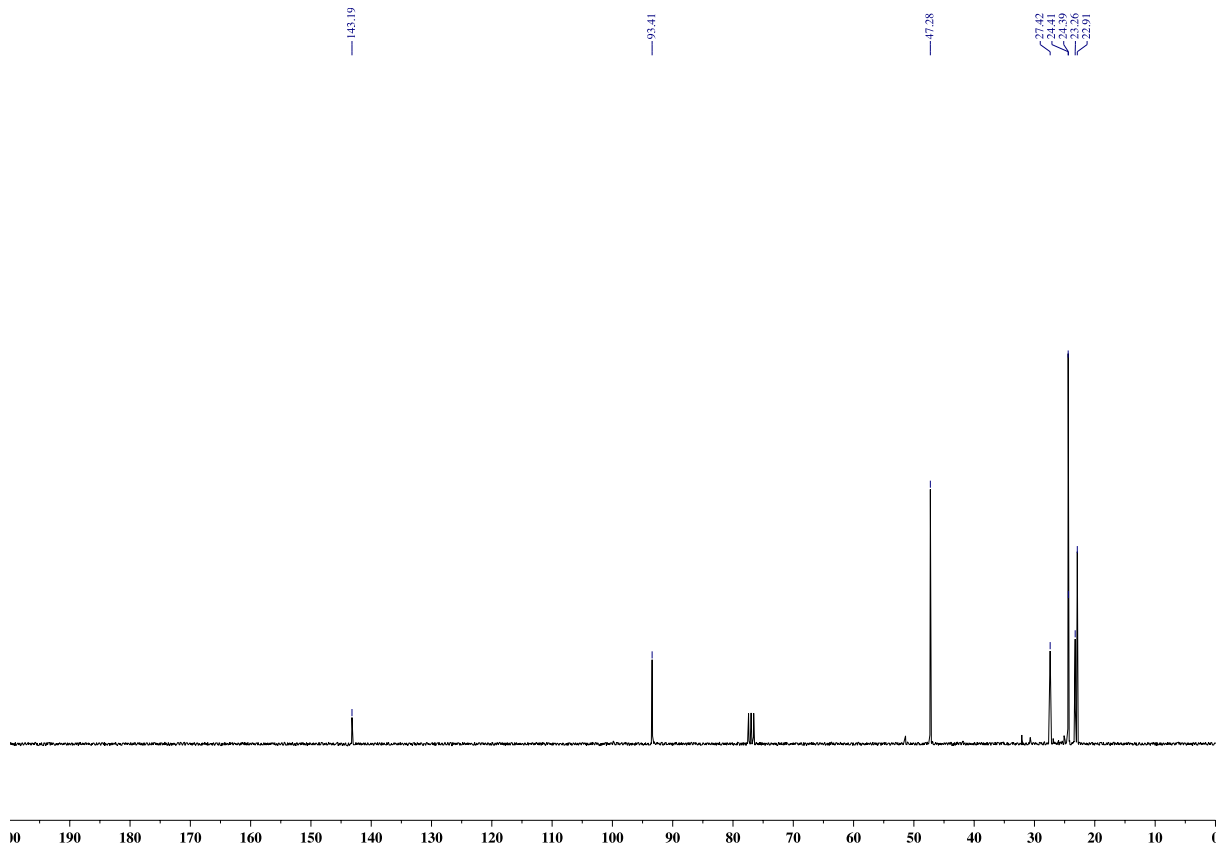

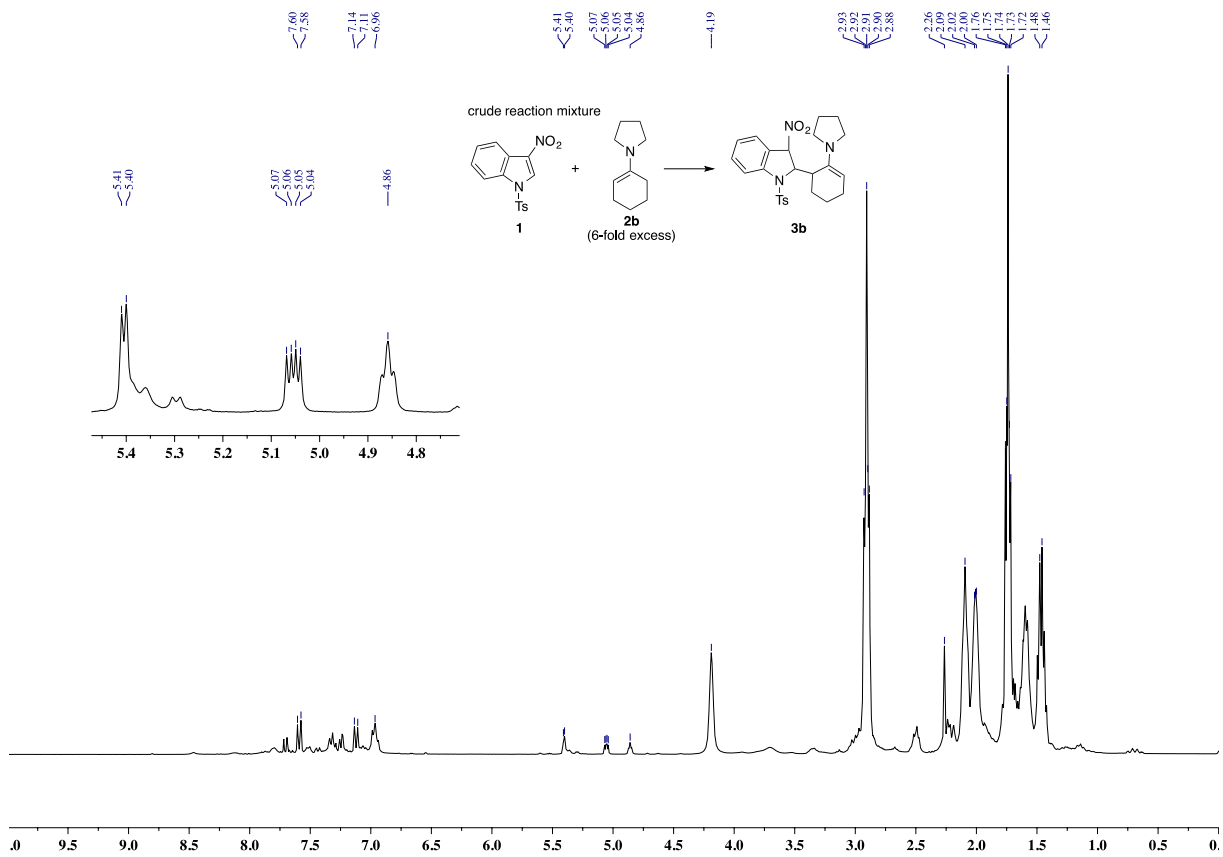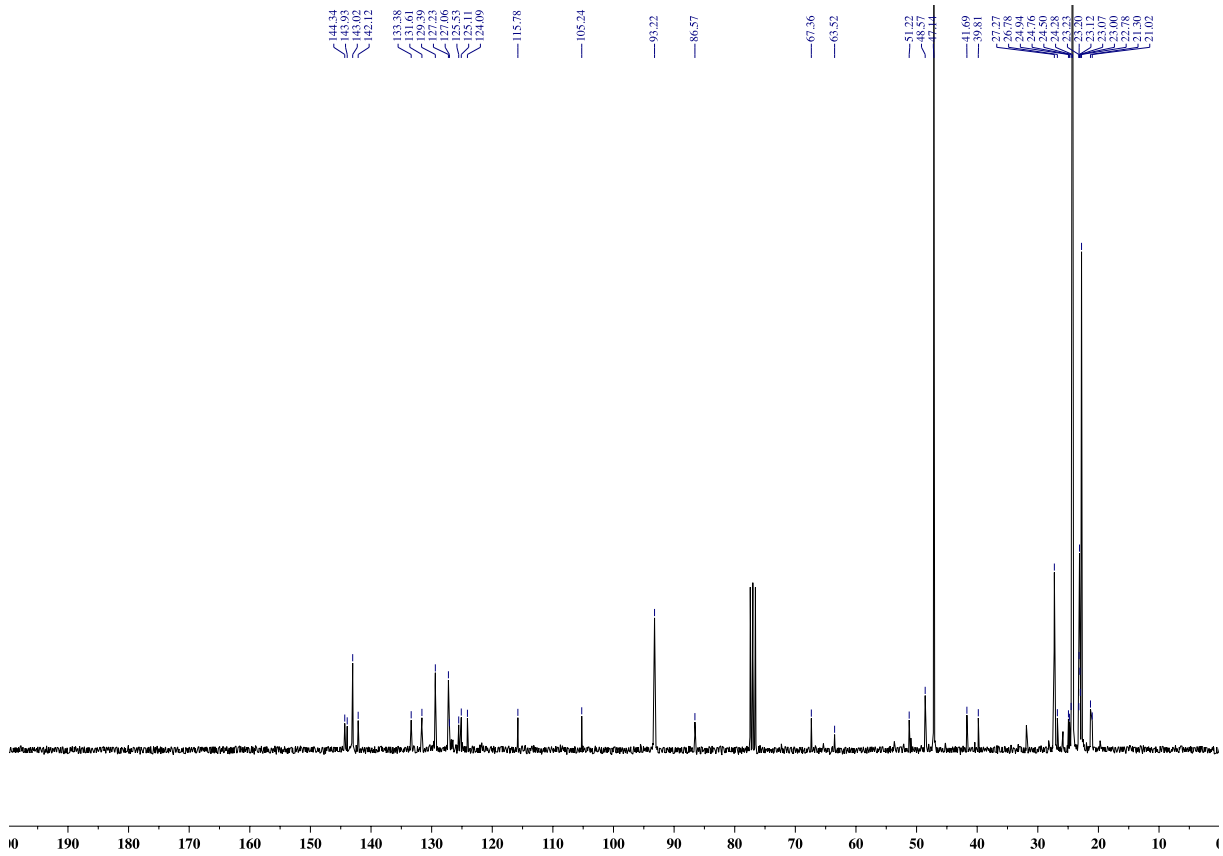

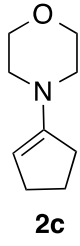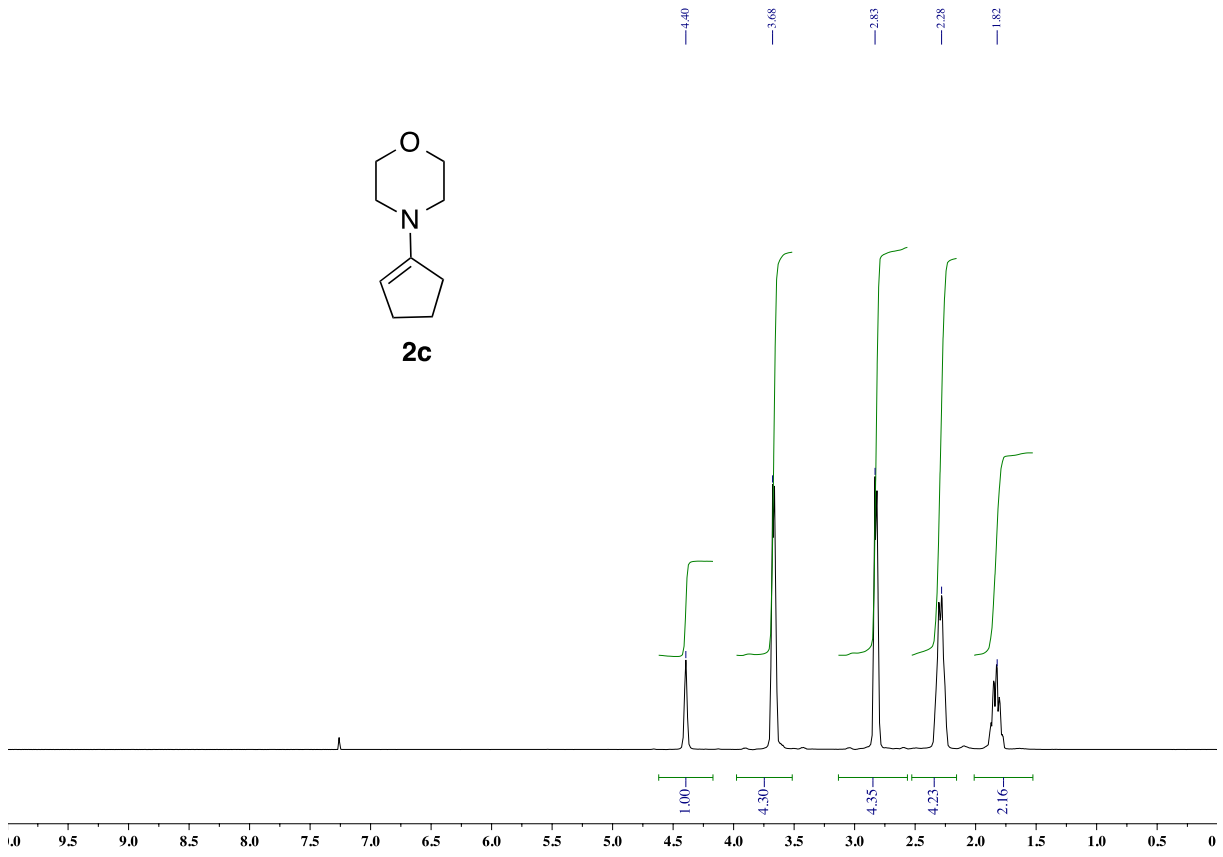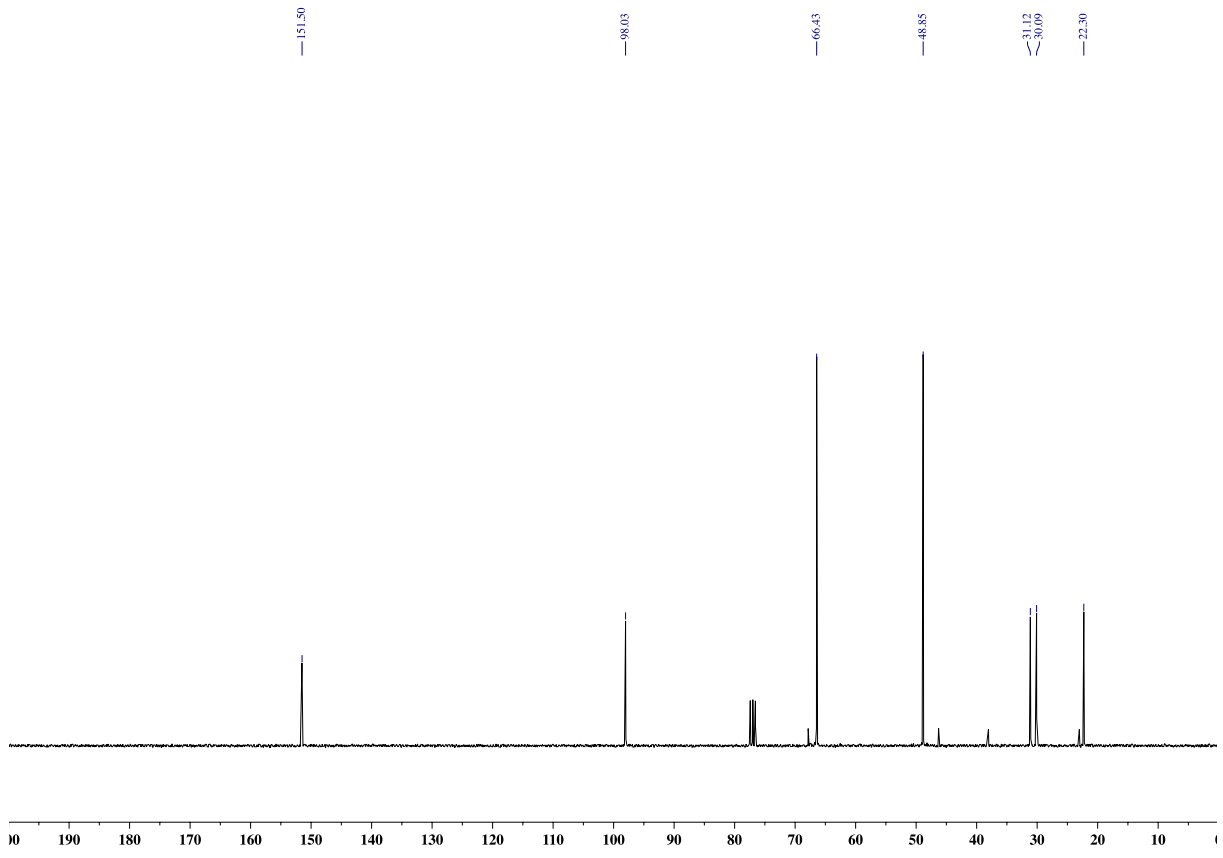

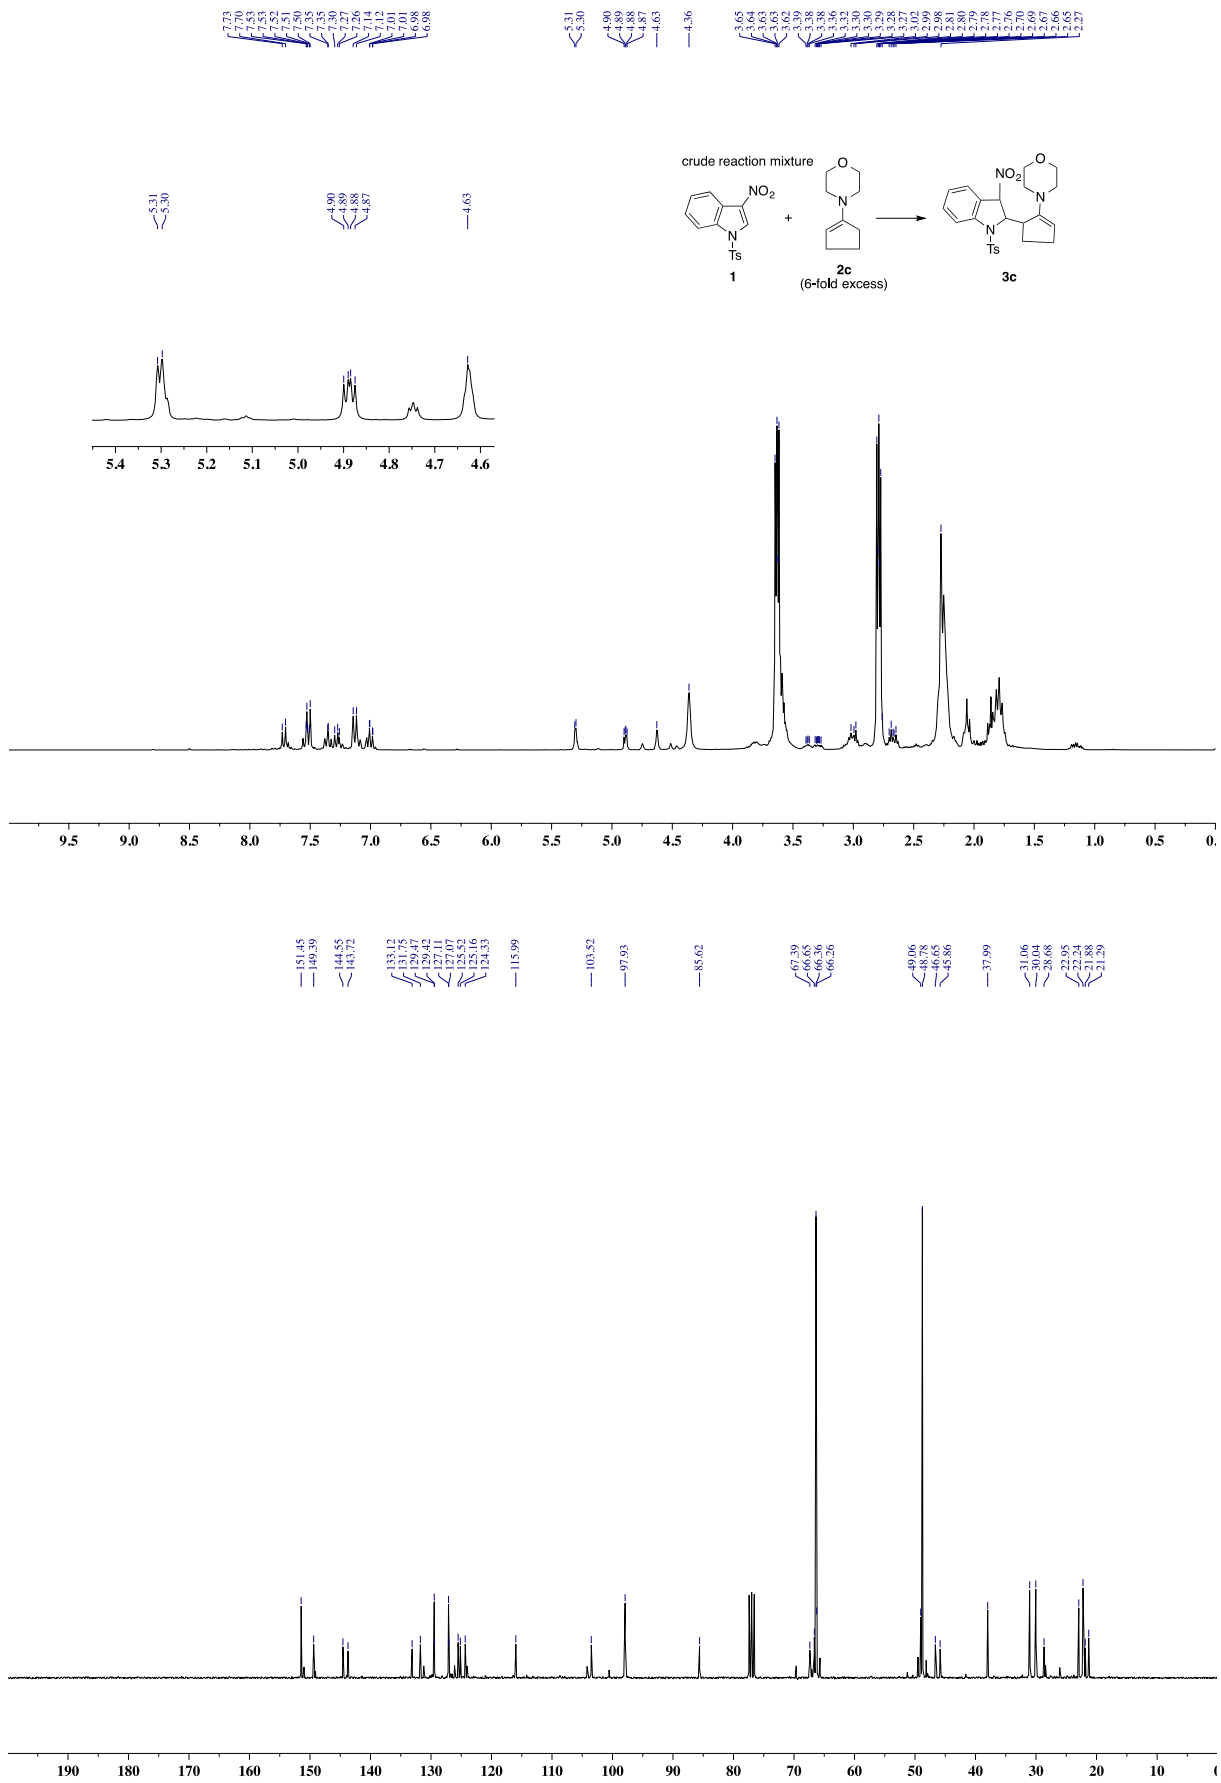

Supplement: c5ob02595h1.pdf [file c5ob02595h1.pdf]
